# Supplementary material for: Plant cell wall glycosyltransferases: High-throughput recombinant expression screening and general requirements for these challenging enzymes
Source: PubMed Central journal article supplement (PMC5466300; doi:10.1371/journal.pone.0177591), 2017-06-09

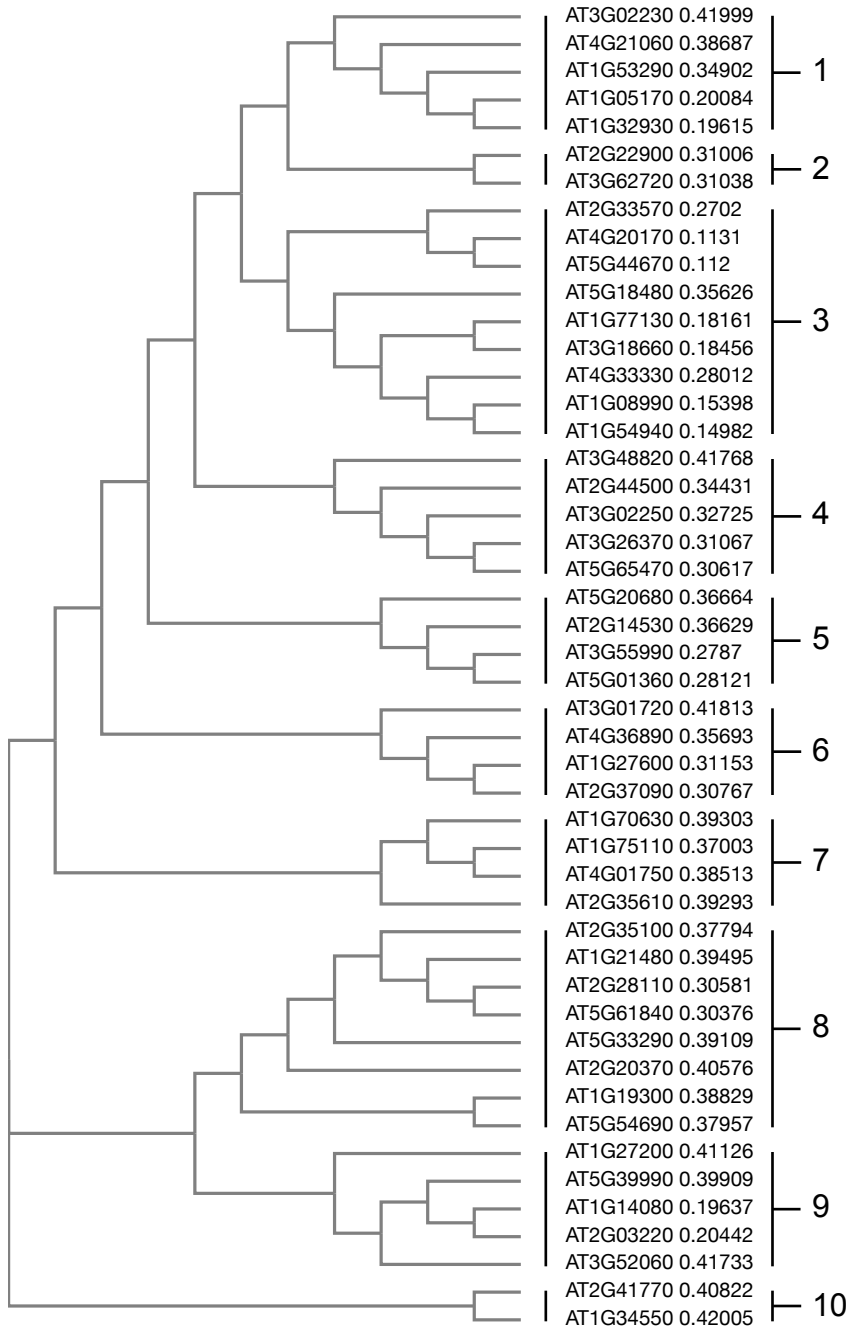

Supplement: pone.0177591.s004.pdf [file pone.0177591.s004.pdf]
